# Supplementary material for: The Equine Gastrointestinal Microbiome: Impacts of Age and Obesity
Source: Front Microbiol. 2018 Dec 7;9:3017. doi: 10.3389/fmicb.2018.03017 (PMC6293011; doi:10.3389/fmicb.2018.03017)
Supplement: TABLE S5 — Relative abundance of bacterial OTUs significantly different in abundance between Control and Aged groups following Deseq analysis. [file Table_5.xlsx]

## Sheet: Sheet1
							Aged v Control		Relative abundance
OTU	Phylum	Class	Order	Family	Genus	Species	log2FoldChange	Adjusted P-value	Control	Aged	Obese
OTU_4	Fibrobacteres	Fibrobacteria	Fibrobacterales	Fibrobacteraceae	Fibrobacter	Unidentified	2.63744	0.00958321	0.00226522	0.0137907	0.0147998
OTU_104	Bacteroidetes	Bacteroidia	Bacteroidales	unclassified	unclassified	Unidentified	1.07107	0.0754983	0.00173476	0.00372952	0.00234588
OTU_178	Bacteroidetes	Bacteroidia	Bacteroidales	Rikenellaceae	Rikenella	uncultured_bacterium_horsej_aai89f03	2.08514	0.0252196	0.00102781	0.00371377	0.000646337
OTU_11	Fibrobacteres	Fibrobacteria	Fibrobacterales	Fibrobacteraceae	Fibrobacter	Unidentified	-5.99203	0.000109528	0.00335107	0.00291945	0.000528397
OTU_139	Bacteroidetes	Bacteroidia	Bacteroidales	Porphyromonadaceae	Paludibacter	uncultured_rumen_bacterium_GRC37	10.609	1.07599e-06	9.31981e-07	0.00286297	0.000207559
OTU_100	Bacteroidetes	Bacteroidia	Bacteroidales	unclassified	unclassified	uncultured_bacterium_horsem_aai95e04	-1.47074	0.0862002	0.00590198	0.00224361	0.00326789
OTU_5636	Fibrobacteres	Fibrobacteria	Fibrobacterales	Fibrobacteraceae	Fibrobacter	Unidentified	8.27336	1.6463e-09	1.40644e-05	0.00223476	0.00204046
OTU_7381	Bacteroidetes	Bacteroidia	Bacteroidales	Rikenellaceae	unclassified	uncultured_bacterium_WA_aaa04h08	1.66558	0.0118442	0.000640017	0.00187165	0.00192037
OTU_766	Bacteroidetes	Bacteroidia	Bacteroidales	unclassified	unclassified	Unidentified	2.35485	0.00656164	0.000279086	0.00177324	0.000673223
OTU_6913	unclassified	unclassified	unclassified	unclassified	unclassified	Unidentified	1.80334	0.068595	0.000421256	0.00147035	0.00044523
OTU_208	Firmicutes	Clostridia	Clostridiales	Ruminococcaceae	Oscillibacter	uncultured_bacterium_BG_aaa03e04.Contig1	1.71259	0.0252196	0.00044464	0.00130405	0.000232294
OTU_72	unclassified	unclassified	unclassified	unclassified	unclassified	uncultured_bacterium_GZ_aaa04a09	-1.27048	0.0728962	0.00230513	0.00115802	0.00204871
OTU_20	Fibrobacteres	Fibrobacteria	Fibrobacterales	Fibrobacteraceae	Fibrobacter	Unidentified	-2.99991	0.0373925	0.0103308	0.00112102	0.00011543
OTU_112	Bacteroidetes	Bacteroidia	Bacteroidales	unclassified	unclassified	Unidentified	-3.09126	0.0908949	0.000936895	0.00104584	4.23005e-05
OTU_182	Spirochaetes	Spirochaetia	Spirochaetales	Spirochaetaceae	Treponema	uncultured_bacterium_horsem_aai93a09	0.955006	0.0597881	0.000493442	0.00094094	0.000951044
OTU_661	Spirochaetes	Spirochaetia	Spirochaetales	Spirochaetaceae	Treponema	uncultured_bacterium_horsem_aai93f05	1.50746	0.0159566	0.000380079	0.000902366	0.00064096
OTU_532	Firmicutes	Clostridia	Clostridiales	Ruminococcaceae	unclassified	uncultured_bacterium_GZ_aaa01c07	0.893763	0.067975	0.000597908	0.000901579	0.000550265
OTU_570	Firmicutes	Clostridia	Clostridiales	Ruminococcaceae	Oscillibacter	uncultured_bacterium_H32	0.971733	0.00958321	0.000483021	0.000829941	0.000632356
OTU_38	Bacteroidetes	unclassified	unclassified	unclassified	unclassified	Unidentified	-1.63333	0.0324575	0.00181525	0.000801797	0.00159021
OTU_310	Firmicutes	Clostridia	Clostridiales	Ruminococcaceae	Ruminococcus	uncultured_bacterium_H26	2.01808	3.04382e-05	0.000178771	0.000793728	0.000521945
OTU_314	Bacteroidetes	Bacteroidia	Bacteroidales	unclassified	unclassified	Unidentified	4.05396	0.0244	7.14237e-05	0.000772276	2.36596e-05
OTU_320	Bacteroidetes	Cytophagia	Cytophagales	unclassified	unclassified	Unidentified	-5.1551	0.000960105	0.000421933	0.000737834	0.00022154
OTU_128	Firmicutes	Clostridia	Clostridiales	Lachnospiraceae	unclassified	uncultured_Firmicutes_bacterium_e60	-1.04228	0.0636668	0.000736604	0.00068135	0.000553849
OTU_375	Bacteroidetes	Bacteroidia	Bacteroidales	unclassified	unclassified	Unidentified	1.58193	0.0252196	0.000252652	0.000678201	0.000433042
OTU_95	Bacteroidetes	Bacteroidia	Bacteroidales	Porphyromonadaceae	unclassified	Unidentified	-2.21022	0.0761386	0.00173577	0.000638249	0.000131562
OTU_782	Firmicutes	Clostridia	Clostridiales	Ruminococcaceae	unclassified	Unidentified	-1.09415	0.0793389	0.000725166	0.000587079	0.000368516
OTU_82	Bacteroidetes	Bacteroidia	Bacteroidales	Prevotellaceae	Paraprevotella	uncultured_bacterium_horsem_aai95b12	-1.62526	0.0181085	0.00171705	0.000567398	0.00144288
OTU_564	Bacteroidetes	Bacteroidia	Bacteroidales	Rikenellaceae	Rikenella	uncultured_bacterium_GZ_aaa02a08	29.9721	1.14137e-38	8.47256e-07	0.000516819	0.000985458
OTU_215	Firmicutes	unclassified	unclassified	unclassified	unclassified	Unidentified	0.83249	0.0804104	0.000290016	0.000509537	0.000388949
OTU_3755	Bacteroidetes	Bacteroidia	Bacteroidales	unclassified	unclassified	uncultured_bacterium_GZ_aaa01h08	2.25393	0.0653607	3.07554e-05	0.00049517	0.000178164
OTU_1057	Firmicutes	Clostridia	Clostridiales	Ruminococcaceae	unclassified	uncultured_bacterium_RH_aaj89e10	1.56744	0.0445029	0.000125055	0.000476473	0.000111487
OTU_212	Tenericutes	Mollicutes	Mycoplasmatales	Mycoplasmataceae	Ureaplasma	uncultured_bacterium_WA_aaa03d11	-2.01582	0.00874207	0.00098341	0.000465255	0.000484305
OTU_327	Bacteroidetes	Bacteroidia	Bacteroidales	unclassified	unclassified	Unidentified	-1.55908	0.0167092	0.00159835	0.000461319	0.000797615
OTU_541	Firmicutes	Clostridia	Clostridiales	Ruminococcaceae	Sporobacter	uncultured_bacterium_AE3_aaa02a12	0.579762	0.0525949	0.00029332	0.00045817	0.000445947
OTU_251	Firmicutes	unclassified	unclassified	unclassified	unclassified	Unidentified	-1.53574	0.0895306	0.000736096	0.000435143	0.000422646
OTU_620	Spirochaetes	Spirochaetia	Spirochaetales	Spirochaetaceae	Treponema	Unidentified	2.13982	0.068595	0.000121751	0.000410936	0.000215087
OTU_535	Tenericutes	Mollicutes	Anaeroplasmatales	Anaeroplasmataceae	Anaeroplasma	Unidentified	1.45976	0.0983837	0.000158098	0.000407	8.53179e-05
OTU_527	Tenericutes	Mollicutes	Anaeroplasmatales	Anaeroplasmataceae	Anaeroplasma	Unidentified	-1.40958	0.0458009	0.000922323	0.000402473	0.000496134
OTU_267	Bacteroidetes	Bacteroidia	Bacteroidales	unclassified	unclassified	Unidentified	0.83002	0.0658753	0.00020673	0.000399324	0.000563887
OTU_478	unclassified	unclassified	unclassified	unclassified	unclassified	uncultured_bacterium_CAP_aah97e09	-2.56235	0.0180919	0.000644338	0.00039342	0.000364214
OTU_6893	Bacteroidetes	Bacteroidia	Bacteroidales	unclassified	unclassified	Unidentified	-4.52717	0.00167453	0.00052962	0.000390861	2.18672e-05
OTU_568	Bacteroidetes	unclassified	unclassified	unclassified	unclassified	Unidentified	1.28488	0.0945231	0.000141576	0.000366457	0.000207559
OTU_422	Bacteroidetes	Bacteroidia	Bacteroidales	unclassified	unclassified	Unidentified	1.70057	0.0987205	0.000116498	0.000358388	0.000156297
OTU_5222	Fibrobacteres	Fibrobacteria	Fibrobacterales	Fibrobacteraceae	Fibrobacter	Unidentified	3.90879	0.00783823	4.62602e-05	0.000337133	0.000330517
OTU_9296	Bacteroidetes	Bacteroidia	Bacteroidales	unclassified	unclassified	Unidentified	-1.54316	0.0458009	0.000737536	0.000335558	0.000577151
OTU_470	Bacteroidetes	unclassified	unclassified	unclassified	unclassified	Unidentified	0.749778	0.0987205	0.00019902	0.00033418	0.000269576
OTU_1557	Firmicutes	Clostridia	Clostridiales	Ruminococcaceae	unclassified	Unidentified	2.1567	0.0208318	6.99833e-05	0.000325915	8.24501e-05
OTU_412	Bacteroidetes	Bacteroidia	Bacteroidales	unclassified	unclassified	Unidentified	-1.73249	0.00592115	0.00123377	0.00032375	0.000701901
OTU_431	Bacteroidetes	unclassified	unclassified	unclassified	unclassified	Unidentified	1.67041	0.00167453	8.93008e-05	0.000307415	0.000146976
OTU_3801	Bacteroidetes	Bacteroidia	Bacteroidales	Prevotellaceae	Paraprevotella	uncultured_bacterium_horsem_aai95b12	-1.46544	0.0989405	0.000584183	0.000306037	0.000873612
OTU_383	Firmicutes	Clostridia	Clostridiales	Lachnospiraceae	Mobilitalea	Unidentified	-1.06279	0.068595	0.000586555	0.000296787	0.000439495
OTU_5894	Bacteroidetes	Bacteroidia	Bacteroidales	unclassified	unclassified	uncultured_bacterium_horsem_aai94f08	3.63549	0.0183511	5.86301e-05	0.000288521	2.25842e-05
OTU_226	Spirochaetes	Spirochaetia	Spirochaetales	Spirochaetaceae	unclassified	Unidentified	-1.50411	0.0952281	0.000623072	0.000248372	0.000388949
OTU_784	Firmicutes	Clostridia	Clostridiales	unclassified	unclassified	Unidentified	2.00559	0.00250477	6.96444e-05	0.000245223	5.41303e-05
OTU_4792	Bacteroidetes	Bacteroidia	Bacteroidales	Porphyromonadaceae	unclassified	uncultured_bacterium_horsem_h12	1.84029	0.0185294	7.88795e-05	0.000239712	9.32044e-05
OTU_264	Bacteroidetes	unclassified	unclassified	unclassified	unclassified	Unidentified	-2.1536	0.0337647	0.000790151	0.000233415	0.000262048
OTU_695	Bacteroidetes	unclassified	unclassified	unclassified	unclassified	Unidentified	1.18984	0.057229	0.000108533	0.00023184	7.27712e-05
OTU_1672	Firmicutes	Clostridia	Clostridiales	Ruminococcaceae	unclassified	Unidentified	-0.929958	0.061287	0.000407784	0.000231053	0.000328008
OTU_1255	Firmicutes	Clostridia	Clostridiales	Ruminococcaceae	unclassified	Unidentified	1.70035	0.033158	8.07435e-05	0.00022692	6.05829e-05
OTU_2850	Bacteroidetes	Bacteroidia	Bacteroidales	Rikenellaceae	Rikenella	uncultured_bacterium_GZ_aaa04a10	1.72864	0.0311593	7.63377e-05	0.000205468	0.000279613
OTU_1553	Firmicutes	unclassified	unclassified	unclassified	unclassified	Unidentified	1.64179	0.0265272	7.79475e-05	0.000205271	0.000104317
OTU_1146	Bacteroidetes	Bacteroidia	Bacteroidales	unclassified	unclassified	Unidentified	-0.91682	0.0787498	0.000333395	0.000200744	0.000858556
OTU_958	Firmicutes	Clostridia	Clostridiales	Lachnospiraceae	unclassified	Unidentified	-1.79387	0.0852413	9.17578e-05	0.000200351	2.58105e-05
OTU_1232	Bacteroidetes	Bacteroidia	Bacteroidales	unclassified	unclassified	Unidentified	2.12351	0.077913	4.90561e-05	0.000184016	4.87531e-05
OTU_1497	Firmicutes	Clostridia	Clostridiales	Christensenellaceae	Christensenella	uncultured_bacterium_ELAND_12	1.56604	0.0987081	3.77029e-05	0.000181457	4.30174e-05
OTU_4313	Bacteroidetes	Bacteroidia	Bacteroidales	unclassified	unclassified	Unidentified	-1.13303	0.0971475	0.00032738	0.000180276	0.000347366
OTU_670	Firmicutes	Clostridia	Clostridiales	unclassified	unclassified	Unidentified	-1.48974	0.0441607	0.00026409	0.000178308	0.000219747
OTU_3779	Bacteroidetes	unclassified	unclassified	unclassified	unclassified	Unidentified	2.71894	0.0341902	3.86349e-05	0.000176537	0.000121883
OTU_1053	Bacteroidetes	Bacteroidia	Bacteroidales	unclassified	unclassified	Unidentified	-1.93117	0.0987205	0.00054504	0.000175356	0.000106827
OTU_877	Elusimicrobia	Endomicrobia	Candidatus Endomicrobium	Candidatus Endomicrobium	Candidatus Endomicrobium	Unidentified	-1.59132	0.0345157	0.000381096	0.000170042	0.000200748
OTU_8916	Bacteroidetes	Bacteroidia	Bacteroidales	unclassified	unclassified	Unidentified	-1.27355	0.0987205	0.000458874	0.00016709	0.000198597
OTU_8608	Firmicutes	Clostridia	Clostridiales	unclassified	unclassified	Unidentified	1.77498	0.079451	7.54905e-05	0.00016276	4.33759e-05
OTU_2615	Bacteroidetes	unclassified	unclassified	unclassified	unclassified	Unidentified	1.49138	0.089394	8.75215e-05	0.000160989	9.82231e-05
OTU_1901	Firmicutes	Clostridia	Clostridiales	Ruminococcaceae	unclassified	uncultured_bacterium_H34	1.92678	0.033158	5.15979e-05	0.000160792	4.15835e-05
OTU_4947	Firmicutes	Clostridia	Clostridiales	Ruminococcaceae	unclassified	Unidentified	1.54967	0.044866	5.84606e-05	0.000149181	6.63185e-05
OTU_1909	Firmicutes	Clostridia	Clostridiales	unclassified	unclassified	Unidentified	2.94435	0.00872967	1.75382e-05	0.000148	2.29426e-05
OTU_3201	Firmicutes	Clostridia	Clostridiales	unclassified	unclassified	Unidentified	2.2581	0.0425523	2.86372e-05	0.000148	0.000157731
OTU_4122	Firmicutes	Clostridia	Clostridiales	unclassified	unclassified	Unidentified	1.79333	0.0503977	5.71898e-05	0.000147409	3.47724e-05
OTU_453	Spirochaetes	Spirochaetia	Spirochaetales	Spirochaetaceae	Treponema	Unidentified	-3.4774	0.0984251	0.000181991	0.000141308	0.000126543
OTU_2126	Proteobacteria	Alphaproteobacteria	unclassified	unclassified	unclassified	Unidentified	3.16711	0.0726692	2.02494e-05	0.000141308	4.15835e-05
OTU_2621	Bacteroidetes	Bacteroidia	Bacteroidales	unclassified	unclassified	Unidentified	3.9	0.057229	1.11838e-05	0.000140521	1.68485e-05
OTU_2762	Firmicutes	Clostridia	Clostridiales	unclassified	unclassified	Unidentified	1.07469	0.0595926	6.46456e-05	0.000139931	8.53179e-05
OTU_2449	Bacteroidetes	Bacteroidia	Bacteroidales	unclassified	unclassified	Unidentified	-1.55047	0.0522278	0.000399227	0.000139537	0.000372101
OTU_873	Bacteroidetes	Bacteroidia	Bacteroidales	unclassified	unclassified	uncultured_bacterium_GZ_aaa01b01	-4.17432	0.068595	0.000122259	0.000133042	9.32044e-06
OTU_1362	Firmicutes	Clostridia	Clostridiales	unclassified	unclassified	Unidentified	1.89699	0.0987234	3.27888e-05	0.000132255	5.16209e-05
OTU_1188	Bacteroidetes	Bacteroidia	Bacteroidales	unclassified	unclassified	Unidentified	-1.34447	0.0597881	0.000256464	0.000129697	0.000276029
OTU_1583	Firmicutes	Clostridia	Clostridiales	Ruminococcaceae	unclassified	uncultured_bacterium_GZ_aaa01d12	-0.992261	0.0265272	0.000226471	0.0001295	0.000316895
OTU_765	Bacteroidetes	Bacteroidia	Bacteroidales	unclassified	unclassified	Unidentified	-1.53785	0.0971475	0.0003783	0.000129303	0.000443438
OTU_1019	Bacteroidetes	Bacteroidia	Bacteroidales	unclassified	unclassified	Unidentified	3.60845	0.0439709	5.87148e-05	0.000128516	0.000418703
OTU_3244	Firmicutes	Clostridia	Clostridiales	Ruminococcaceae	Anaerotruncus	Unidentified	1.12947	0.057229	5.33771e-05	0.000123202	7.70729e-05
OTU_2261	Firmicutes	Clostridia	Clostridiales	unclassified	unclassified	Unidentified	1.77144	0.0118442	4.76158e-05	0.000121037	6.48846e-05
OTU_2160	Firmicutes	Clostridia	Clostridiales	unclassified	unclassified	Unidentified	-2.11066	0.00498043	0.000346612	0.00012084	0.000248067
OTU_856	Firmicutes	Clostridia	Clostridiales	unclassified	unclassified	Unidentified	-1.30476	0.0345157	0.000200545	0.000119463	0.000204333
OTU_2379	Firmicutes	Clostridia	Clostridiales	unclassified	unclassified	Unidentified	1.54246	0.0745047	4.98186e-05	0.00011592	4.69607e-05
OTU_8546	Firmicutes	Clostridia	Clostridiales	Ruminococcaceae	unclassified	Unidentified	1.08583	0.0983837	5.26993e-05	0.000110803	0.000106827
OTU_4428	Firmicutes	Clostridia	Clostridiales	Lachnospiraceae	unclassified	Unidentified	-0.987113	0.0799276	0.000214525	0.000110016	0.000167409
OTU_2733	Firmicutes	Clostridia	Clostridiales	Ruminococcaceae	unclassified	uncultured_bacterium_H34	1.75043	0.016449	2.90609e-05	0.000109819	5.34133e-05
OTU_3448	Firmicutes	Clostridia	Clostridiales	unclassified	unclassified	Unidentified	1.29886	0.0987205	5.47327e-05	0.000107064	3.54894e-05
OTU_3301	Bacteroidetes	Bacteroidia	Bacteroidales	unclassified	unclassified	Unidentified	-2.20443	0.00783823	0.000543938	0.000103915	0.000196088
OTU_438	unclassified	unclassified	unclassified	unclassified	unclassified	Unidentified	-1.30882	0.0734099	0.000183007	0.000100372	0.000319046
OTU_589	Firmicutes	Negativicutes	Selenomonadales	Acidaminococcaceae	Phascolarctobacterium	Unidentified	-2.04545	0.0522278	0.000356695	9.50584e-05	0.00065745
OTU_1959	Bacteroidetes	unclassified	unclassified	unclassified	unclassified	Unidentified	3.66753	0.068595	4.40573e-06	9.21063e-05	5.12624e-05
OTU_1555	Firmicutes	unclassified	unclassified	unclassified	unclassified	Unidentified	2.84352	0.0987205	1.40644e-05	8.89573e-05	3.76403e-05
OTU_2420	Actinobacteria	Actinobacteria	Coriobacteriales	Coriobacteriaceae	unclassified	Unidentified	0.803727	0.0987205	4.82089e-05	8.81701e-05	9.24875e-05
OTU_933	Bacteroidetes	unclassified	unclassified	unclassified	unclassified	Unidentified	-1.20586	0.0931899	0.000179025	8.77765e-05	5.19794e-05
OTU_1485	Firmicutes	unclassified	unclassified	unclassified	unclassified	Unidentified	1.84678	0.0450083	2.6858e-05	8.56116e-05	4.40929e-05
OTU_861	Bacteroidetes	unclassified	unclassified	unclassified	unclassified	Unidentified	-2.20539	0.0987205	0.000291117	8.20691e-05	0.000116147
OTU_846	Firmicutes	unclassified	unclassified	unclassified	unclassified	Unidentified	-2.2056	0.00658246	0.000277053	8.06914e-05	0.000249501
OTU_494	Bacteroidetes	unclassified	unclassified	unclassified	unclassified	Unidentified	-1.51617	0.0265272	0.000194276	8.0101e-05	0.000134429
OTU_2332	Firmicutes	Clostridia	Clostridiales	unclassified	unclassified	Unidentified	-0.847365	0.0872608	0.000117769	7.75425e-05	0.000113279
OTU_1074	Firmicutes	Clostridia	Clostridiales	unclassified	unclassified	Unidentified	-1.01212	0.0219107	0.000133528	7.67552e-05	0.000124751
OTU_1631	Spirochaetes	Spirochaetia	Spirochaetales	Spirochaetaceae	Sphaerochaeta	Unidentified	1.43523	0.0653607	2.779e-05	7.67552e-05	3.90742e-05
OTU_574	unclassified	unclassified	unclassified	unclassified	unclassified	Unidentified	-1.30448	0.079451	0.000166909	7.65584e-05	0.000233728
OTU_355	Spirochaetes	Spirochaetia	Spirochaetales	Spirochaetaceae	Treponema	uncultured_bacterium_horsem_aai94e01	-9.1084	3.18775e-05	0.000479293	7.5968e-05	7.70729e-05
OTU_1849	Firmicutes	Negativicutes	Selenomonadales	Veillonellaceae	unclassified	Unidentified	-1.23806	0.0597881	0.000169028	7.22286e-05	0.000178522
OTU_1771	Firmicutes	Clostridia	Clostridiales	Lachnospiraceae	unclassified	Unidentified	1.22268	0.0983837	3.25346e-05	7.1835e-05	9.85816e-05
OTU_858	Firmicutes	Clostridia	Clostridiales	unclassified	unclassified	Unidentified	-1.66171	0.057229	0.000171908	7.12446e-05	0.000117222
OTU_2335	Bacteroidetes	Bacteroidia	Bacteroidales	unclassified	unclassified	Unidentified	-2.2501	0.0652127	4.16003e-05	6.92765e-05	7.77899e-05
OTU_7950	Firmicutes	Clostridia	Clostridiales	Ruminococcaceae	unclassified	uncultured_bacterium_WA_aaa04c07	2.15268	0.0337912	2.29606e-05	6.80957e-05	2.68859e-05
OTU_260	unclassified	unclassified	unclassified	unclassified	unclassified	Unidentified	-2.9281	0.0153773	0.000627139	6.7702e-05	0.000139448
OTU_2084	Bacteroidetes	Bacteroidia	Bacteroidales	unclassified	unclassified	uncultured_bacterium_w.19	-1.22178	0.0987205	0.000141238	6.73084e-05	0.000170994
OTU_1155	Bacteroidetes	Bacteroidia	Bacteroidales	unclassified	unclassified	Unidentified	-2.60014	0.0252854	0.000402192	6.71116e-05	0.000339121
OTU_241	Firmicutes	Clostridia	Clostridiales	Lachnospiraceae	unclassified	Unidentified	-3.10315	2.1562e-08	0.000453028	6.69148e-05	0.000340196
OTU_655	unclassified	unclassified	unclassified	unclassified	unclassified	Unidentified	-2.56347	0.00258111	0.000126241	6.61276e-05	0.000124034
OTU_7990	Bacteroidetes	Bacteroidia	Bacteroidales	Porphyromonadaceae	Coprobacter	uncultured_bacterium_AE1_aaa03c07	1.76675	0.0983837	2.21981e-05	6.51435e-05	4.66022e-05
OTU_1706	Firmicutes	Clostridia	Clostridiales	unclassified	unclassified	Unidentified	1.10324	0.0652127	2.95692e-05	6.35691e-05	6.20168e-05
OTU_1600	Bacteroidetes	Bacteroidia	Bacteroidales	unclassified	unclassified	Unidentified	2.76859	0.0219107	1.03365e-05	6.29787e-05	7.88653e-05
OTU_2341	Bacteroidetes	Bacteroidia	Bacteroidales	unclassified	unclassified	uncultured_bacterium_horsem_aai93b05	-2.63671	0.0450251	0.000271461	6.14042e-05	0.000217596
OTU_998	Firmicutes	unclassified	unclassified	unclassified	unclassified	Unidentified	-2.0503	0.0895306	0.00017284	6.10106e-05	0.000115789
OTU_1321	Bacteroidetes	Bacteroidia	Bacteroidales	unclassified	unclassified	Unidentified	-1.74663	0.0895306	0.000210797	6.0617e-05	0.00018856
OTU_1764	Bacteroidetes	Cytophagia	Cytophagales	unclassified	unclassified	Unidentified	-2.4306	0.0522278	0.000119633	6.04201e-05	0.000545963
OTU_623	Bacteroidetes	Bacteroidia	Bacteroidales	Prevotellaceae	unclassified	Unidentified	-1.78683	0.0658753	0.00019775	6.04201e-05	6.95448e-05
OTU_5670	Bacteroidetes	Bacteroidia	Bacteroidales	unclassified	unclassified	Unidentified	-1.82142	0.0787498	0.000207917	6.00265e-05	0.00022154
OTU_2110	unclassified	unclassified	unclassified	unclassified	unclassified	uncultured_bacterium_WA_aaa03b05	2.11955	0.0987205	1.18616e-05	5.88457e-05	3.72818e-05
OTU_3879	Bacteroidetes	Bacteroidia	Bacteroidales	Marinilabiliaceae	unclassified	uncultured_bacterium_horsem_aai96a04	-3.23436	0.068595	0.000651624	5.7468e-05	3.26216e-05
OTU_9011	Bacteroidetes	Bacteroidia	Bacteroidales	Bacteroidales_incertae_sedis	Phocaeicola	Unidentified	-1.91405	0.0458009	0.000119971	5.27446e-05	0.000122958
OTU_1014	Firmicutes	Clostridia	Clostridiales	Lachnospiraceae	unclassified	Unidentified	-2.01894	0.033158	0.000116837	5.25478e-05	6.63185e-05
OTU_1300	Firmicutes	Clostridia	Clostridiales	Lachnospiraceae	unclassified	Unidentified	-1.13288	0.0900706	9.32829e-05	5.19574e-05	5.16209e-05
OTU_650	Firmicutes	Clostridia	Clostridiales	Lachnospiraceae	unclassified	Unidentified	-2.77935	0.0862002	0.000384485	5.19574e-05	0.000189635
OTU_1116	Firmicutes	Clostridia	Clostridiales	unclassified	unclassified	Unidentified	-1.6251	0.033158	0.000143271	4.99893e-05	9.53553e-05
OTU_3176	Firmicutes	unclassified	unclassified	unclassified	unclassified	Unidentified	-1.78646	0.0653607	0.00016996	4.99893e-05	9.64307e-05
OTU_4677	unclassified	unclassified	unclassified	unclassified	unclassified	Unidentified	-1.9977	0.0957273	0.000258413	4.99893e-05	0.000272085
OTU_8197	Firmicutes	Clostridia	Clostridiales	unclassified	unclassified	Unidentified	-1.27631	0.0987081	9.06564e-05	4.90053e-05	0.000115072
OTU_349	Tenericutes	Mollicutes	Mycoplasmatales	Mycoplasmataceae	Ureaplasma	uncultured_bacterium_WA_aaa03d11	-3.59642	6.46268e-06	0.000638238	4.90053e-05	0.000516926
OTU_1380	Firmicutes	Clostridia	Clostridiales	Ruminococcaceae	Oscillibacter	Unidentified	-1.81975	0.00775514	0.000182923	4.50691e-05	0.00012009
OTU_1912	Firmicutes	Clostridia	Clostridiales	unclassified	unclassified	uncultured_bacterium_horsej_aai91a09	-3.2388	0.0594562	9.30287e-05	4.48723e-05	9.9657e-05
OTU_1358	Bacteroidetes	unclassified	unclassified	unclassified	unclassified	Unidentified	-2.23676	0.0793389	0.000126156	4.48723e-05	2.11502e-05
OTU_829	Bacteroidetes	Bacteroidia	Bacteroidales	unclassified	unclassified	Unidentified	-2.33907	0.031219	0.000236469	4.46755e-05	0.000113996
OTU_1662	Spirochaetes	Spirochaetia	Spirochaetales	Spirochaetaceae	Treponema	uncultured_bacterium_horsej_aai92a04	-3.62024	0.00958321	6.17649e-05	4.29042e-05	0.000116864
OTU_965	Firmicutes	Clostridia	Clostridiales	Lachnospiraceae	unclassified	Unidentified	-1.69446	0.0540832	0.00012031	3.87712e-05	0.000143033
OTU_1737	unclassified	unclassified	unclassified	unclassified	unclassified	Unidentified	-1.52092	0.0176644	0.000110143	3.85744e-05	5.0187e-05
OTU_1379	Firmicutes	Clostridia	Clostridiales	Lachnospiraceae	unclassified	Unidentified	-1.5861	0.0117399	0.000105992	3.71968e-05	9.85816e-05
OTU_9218	unclassified	unclassified	unclassified	unclassified	unclassified	Unidentified	-2.51994	0.0290142	0.000264852	3.71968e-05	0.000189277
OTU_1275	Bacteroidetes	unclassified	unclassified	unclassified	unclassified	Unidentified	-1.8655	0.0761386	0.000140983	3.7e-05	0.00013658
OTU_2125	Bacteroidetes	unclassified	unclassified	unclassified	unclassified	Unidentified	-2.02029	0.00978732	0.000101925	3.62127e-05	6.38092e-05
OTU_2239	Bacteroidetes	Bacteroidia	Bacteroidales	unclassified	unclassified	Unidentified	-1.99376	0.031219	0.000115735	3.54255e-05	0.000121883
OTU_46	Bacteroidetes	Bacteroidia	Bacteroidales	unclassified	unclassified	Unidentified	-5.15846	0.0231837	0.0025338	3.52287e-05	4.66022e-06
OTU_4067	Firmicutes	unclassified	unclassified	unclassified	unclassified	Unidentified	-1.97046	0.0317683	0.000124292	3.46383e-05	0.000236237
OTU_2135	Firmicutes	Clostridia	Clostridiales	unclassified	unclassified	Unidentified	-1.64361	0.0895306	7.6253e-05	3.40478e-05	8.71103e-05
OTU_452	Bacteroidetes	Bacteroidia	Bacteroidales	unclassified	unclassified	Unidentified	-3.16408	0.0311593	0.000311536	3.3851e-05	0.000152712
OTU_1550	Firmicutes	Clostridia	Clostridiales	unclassified	unclassified	Unidentified	-1.63457	0.0652127	7.04917e-05	3.3851e-05	3.87157e-05
OTU_3083	Firmicutes	Clostridia	Clostridiales	Ruminococcaceae	unclassified	uncultured_bacterium_D147_ERTU_65	-2.10268	0.0761386	9.65872e-05	3.34574e-05	7.88653e-05
OTU_2051	Bacteroidetes	unclassified	unclassified	unclassified	unclassified	Unidentified	-2.85966	0.0244	0.000149202	3.26702e-05	0.000101449
OTU_1470	unclassified	unclassified	unclassified	unclassified	unclassified	Unidentified	-1.64818	0.0289266	0.000100908	3.18829e-05	6.38092e-05
OTU_1142	Firmicutes	Clostridia	Clostridiales	Ruminococcaceae	Oscillibacter	Unidentified	-2.01866	0.0254544	0.000116921	3.14893e-05	3.79987e-05
OTU_1340	Actinobacteria	Actinobacteria	Coriobacteriales	Coriobacteriaceae	unclassified	Unidentified	-1.9276	0.0118564	6.97292e-05	3.03085e-05	6.56016e-05
OTU_1349	Bacteroidetes	Bacteroidia	Bacteroidales	Prolixibacteraceae	unclassified	uncultured_bacterium_horsem_aai94c02	-4.25355	0.0252196	0.000413884	2.95212e-05	3.298e-05
OTU_2240	Firmicutes	Clostridia	Clostridiales	Lachnospiraceae	unclassified	Unidentified	-1.53379	0.0656298	7.21015e-05	2.93244e-05	6.27338e-05
OTU_2048	Bacteroidetes	Bacteroidia	Bacteroidales	unclassified	unclassified	Unidentified	-2.59305	0.014401	0.000135815	2.83404e-05	0.000142674
OTU_1310	Firmicutes	Negativicutes	Selenomonadales	Acidaminococcaceae	Phascolarctobacterium	Unidentified	-1.87892	0.0658753	0.000123954	2.79468e-05	0.000126543
OTU_3477	Bacteroidetes	Bacteroidia	Bacteroidales	unclassified	unclassified	Unidentified	-1.99588	0.0595926	0.000131918	2.67659e-05	0.000184258
OTU_6597	Bacteroidetes	unclassified	unclassified	unclassified	unclassified	Unidentified	-2.43749	0.0761386	0.000119124	2.63723e-05	6.30922e-05
OTU_814	Bacteroidetes	Bacteroidia	Bacteroidales	unclassified	unclassified	Unidentified	-3.25183	0.0180686	0.000159369	2.63723e-05	0.000170636
OTU_6284	Bacteroidetes	Bacteroidia	Bacteroidales	unclassified	unclassified	Unidentified	-2.00197	0.0658753	7.88795e-05	2.61755e-05	1.11128e-05
OTU_1241	Bacteroidetes	unclassified	unclassified	unclassified	unclassified	Unidentified	-1.77841	0.0311105	8.19296e-05	2.59787e-05	5.41303e-05
OTU_5352	Bacteroidetes	Bacteroidia	Bacteroidales	Marinilabiliaceae	Alkalitalea	Unidentified	-5.40522	0.0522278	0.000620361	2.55851e-05	0.00029933
OTU_1648	unclassified	unclassified	unclassified	unclassified	unclassified	Unidentified	-2.13004	0.00874207	7.25251e-05	2.4601e-05	5.8432e-05
OTU_173	Firmicutes	unclassified	unclassified	unclassified	unclassified	Unidentified	-7.68829	0.00101247	0.000635442	2.3617e-05	2.07918e-05
OTU_611	Bacteroidetes	Bacteroidia	Bacteroidales	unclassified	unclassified	Unidentified	-3.57088	0.0265272	0.000256888	2.28298e-05	0.000154504
OTU_919	Candidatus Saccharibacteria	Saccharibacteria_genera_incertae_sedis	Saccharibacteria_genera_incertae_sedis	Saccharibacteria_genera_incertae_sedis	Saccharibacteria_genera_incertae_sedis	Unidentified	-3.08384	0.0861583	0.000140983	2.28298e-05	9.39214e-05
OTU_1417	Firmicutes	Clostridia	Clostridiales	unclassified	unclassified	Unidentified	-2.65549	0.0117399	0.000114464	2.20425e-05	8.46009e-05
OTU_2796	Firmicutes	Clostridia	Clostridiales	unclassified	unclassified	Unidentified	0.932635	0.0647611	3.20263e-05	2.18457e-05	6.6677e-05
OTU_9639	Bacteroidetes	Bacteroidia	Bacteroidales	Marinilabiliaceae	unclassified	uncultured_bacterium_horsem_aai96a04	-3.31429	0.0352712	0.000391347	2.16489e-05	1.29052e-05
OTU_7303	Bacteroidetes	Bacteroidia	Bacteroidales	unclassified	unclassified	Unidentified	-2.10074	0.0265272	0.000106839	2.14521e-05	0.00012009
OTU_7186	Bacteroidetes	Bacteroidia	Bacteroidales	unclassified	unclassified	Unidentified	-3.33842	0.00101247	0.000180042	2.14521e-05	9.46383e-05
OTU_601	unclassified	unclassified	unclassified	unclassified	unclassified	Unidentified	-3.51462	0.0373925	0.000176822	2.12553e-05	4.58853e-05
OTU_1192	Firmicutes	Clostridia	Clostridiales	Lachnospiraceae	unclassified	Unidentified	-2.89285	0.057229	0.00011726	2.12553e-05	0.000101449
OTU_2265	Spirochaetes	Spirochaetia	Spirochaetales	Spirochaetaceae	Sphaerochaeta	Unidentified	-2.07272	0.068595	8.43867e-05	2.12553e-05	5.77151e-05
OTU_548	Bacteroidetes	Bacteroidia	Bacteroidales	unclassified	unclassified	Unidentified	-4.6934	0.0282279	0.000434981	2.00744e-05	0.000154863
OTU_1661	Firmicutes	Clostridia	Clostridiales	Lachnospiraceae	unclassified	Unidentified	-1.73066	0.0695687	6.61707e-05	1.98776e-05	6.95448e-05
OTU_552	Bacteroidetes	unclassified	unclassified	unclassified	unclassified	Unidentified	-3.05683	0.0100021	0.000176399	1.92872e-05	6.91864e-05
OTU_3846	Firmicutes	Clostridia	Clostridiales	Lachnospiraceae	unclassified	Unidentified	-1.35456	0.0983837	4.20239e-05	1.92872e-05	5.77151e-05
OTU_1041	Firmicutes	unclassified	unclassified	unclassified	unclassified	Unidentified	-3.19352	0.0265272	0.000118192	1.88936e-05	1.89994e-05
OTU_8899	Bacteroidetes	Bacteroidia	Bacteroidales	Prevotellaceae	Prevotella	uncultured_bacterium_AE3_aaa01b05	-3.01695	0.0252196	0.000238503	1.73191e-05	2.11502e-05
OTU_1043	Firmicutes	Clostridia	Clostridiales	Lachnospiraceae	Anaerosporobacter	Unidentified	-2.91504	0.0597881	0.000113617	1.69255e-05	6.34507e-05
OTU_1034	unclassified	unclassified	unclassified	unclassified	unclassified	Unidentified	-2.91437	0.0282279	0.000100061	1.61383e-05	6.02244e-05
OTU_949	Firmicutes	Clostridia	Clostridiales	Ruminococcaceae	unclassified	Unidentified	-1.96256	0.057229	5.94774e-05	1.59415e-05	0.000190711
OTU_269	Spirochaetes	Spirochaetia	Spirochaetales	Spirochaetaceae	Treponema	Unidentified	-5.30587	0.00200585	0.000456671	1.5351e-05	7.52805e-06
OTU_2943	Synergistetes	Synergistia	Synergistales	Synergistaceae	Pyramidobacter	Unidentified	-2.0168	0.0458009	6.21038e-05	1.49574e-05	3.54894e-05
OTU_1162	Firmicutes	Clostridia	Clostridiales	Ruminococcaceae	unclassified	Unidentified	-2.26514	0.0657578	7.1e-05	1.49574e-05	4.33759e-05
OTU_3087	Firmicutes	Clostridia	Clostridiales	Lachnospiraceae	Lachnospiracea_incertae_sedis	Unidentified	-1.81247	0.057229	5.35466e-05	1.49574e-05	7.88653e-05
OTU_1556	Firmicutes	Clostridia	Clostridiales	Ruminococcaceae	unclassified	Unidentified	-1.59135	0.0987205	4.28711e-05	1.45638e-05	4.40929e-05
OTU_808	SR1	SR1_genera_incertae_sedis	SR1_genera_incertae_sedis	SR1_genera_incertae_sedis	SR1_genera_incertae_sedis	Unidentified	-4.40156	0.00335459	0.000222913	1.45638e-05	8.3884e-05
OTU_8770	Spirochaetes	Spirochaetia	Spirochaetales	Spirochaetaceae	Sphaerochaeta	Unidentified	-2.3097	0.0983837	5.78676e-05	1.39734e-05	8.96196e-06
OTU_1072	Firmicutes	Clostridia	Clostridiales	Ruminococcaceae	unclassified	Unidentified	-2.59216	0.0525949	7.45585e-05	1.37766e-05	8.35255e-05
OTU_3550	Firmicutes	Clostridia	Clostridiales	Ruminococcaceae	unclassified	Unidentified	-1.46087	0.0987205	3.49917e-05	1.37766e-05	2.25842e-05
OTU_2818	Firmicutes	unclassified	unclassified	unclassified	unclassified	Unidentified	-2.07571	0.0672125	3.67709e-05	1.3383e-05	3.01122e-05
OTU_1655	unclassified	unclassified	unclassified	unclassified	unclassified	Unidentified	-2.19882	0.0895306	4.57518e-05	1.25957e-05	8.42425e-05
OTU_1158	unclassified	unclassified	unclassified	unclassified	unclassified	Unidentified	-3.18822	0.0945231	0.000339834	1.25957e-05	0.000199673
OTU_9003	Spirochaetes	Spirochaetia	Spirochaetales	Spirochaetaceae	Treponema	Unidentified	-2.97537	0.068595	0.000102179	1.18085e-05	3.65648e-05
OTU_1094	Firmicutes	Clostridia	Clostridiales	Ruminococcaceae	unclassified	Unidentified	-3.29284	0.00258111	7.3796e-05	1.12181e-05	6.05829e-05
OTU_9057	unclassified	unclassified	unclassified	unclassified	unclassified	Unidentified	-2.1202	0.057229	4.54976e-05	1.10213e-05	3.3697e-05
OTU_9647	Bacteroidetes	Bacteroidia	Bacteroidales	unclassified	unclassified	Unidentified	-2.56151	0.0787498	9.87053e-05	1.10213e-05	5.80735e-05
OTU_1001	Bacteroidetes	unclassified	unclassified	unclassified	unclassified	Unidentified	-2.72879	0.0306778	7.82864e-05	1.10213e-05	0.000130128
OTU_2147	Bacteroidetes	Bacteroidia	Bacteroidales	unclassified	unclassified	Unidentified	-2.29588	0.0872608	4.787e-05	9.84041e-06	1.07544e-05
OTU_1731	unclassified	unclassified	unclassified	unclassified	unclassified	Unidentified	-2.36624	0.057229	4.90561e-05	9.4468e-06	1.54146e-05
OTU_9381	Spirochaetes	Spirochaetia	Spirochaetales	Spirochaetaceae	Treponema	uncultured_bacterium_WA_aaa02d10	-2.66304	0.0761089	7.73545e-05	9.24999e-06	6.81109e-06
OTU_2433	Firmicutes	Clostridia	Clostridiales	unclassified	unclassified	Unidentified	-2.47851	0.016449	4.28711e-05	8.65956e-06	3.69233e-05
OTU_1141	Proteobacteria	unclassified	unclassified	unclassified	unclassified	Unidentified	-3.45293	0.0926774	0.000101332	8.65956e-06	6.77525e-05
OTU_5376	Firmicutes	Clostridia	Clostridiales	Ruminococcaceae	unclassified	Unidentified	-2.38344	0.00958321	3.70251e-05	8.26595e-06	2.93952e-05
OTU_1618	Firmicutes	Clostridia	Clostridiales	Lachnospiraceae	Lachnospiracea_incertae_sedis	uncultured_bacterium_horsem_aai94f06	-3.21451	0.033158	8.32005e-05	7.67552e-06	4.51683e-05
OTU_3223	Bacteroidetes	Bacteroidia	Bacteroidales	unclassified	unclassified	Unidentified	-2.4143	0.0803803	4.25322e-05	7.47871e-06	6.88279e-05
OTU_1831	Bacteroidetes	unclassified	unclassified	unclassified	unclassified	Unidentified	-3.52396	0.0118564	7.23556e-05	6.49467e-06	4.69607e-05
OTU_8114	Bacteroidetes	Bacteroidia	Bacteroidales	Porphyromonadaceae	Paludibacter	uncultured_bacterium_horsej_aai91e03	-3.83565	0.068595	0.000217321	6.29787e-06	1.14713e-05
OTU_2189	Firmicutes	Clostridia	Clostridiales	unclassified	unclassified	Unidentified	-2.18393	0.0657578	2.53329e-05	5.90425e-06	4.947e-05
OTU_257	unclassified	unclassified	unclassified	unclassified	unclassified	Unidentified	-4.81814	0.00450129	0.000678906	5.90425e-06	0.000373893
OTU_2381	Firmicutes	Clostridia	Clostridiales	unclassified	unclassified	uncultured_bacterium_horsej_aai89c11	-2.96787	0.0312245	4.62602e-05	5.90425e-06	2.25842e-05
OTU_1063	Spirochaetes	Spirochaetia	Spirochaetales	Spirochaetaceae	Treponema	Unidentified	-3.83262	3.18775e-05	8.80299e-05	5.51063e-06	8.3167e-05
OTU_1463	Bacteroidetes	unclassified	unclassified	unclassified	unclassified	Unidentified	-3.58292	0.0441607	9.42996e-05	5.51063e-06	8.96196e-06
OTU_1558	Bacteroidetes	unclassified	unclassified	unclassified	unclassified	Unidentified	-4.24424	0.00200585	0.000129207	5.31382e-06	9.06951e-05
OTU_2492	Firmicutes	Clostridia	Clostridiales	Ruminococcaceae	unclassified	uncultured_bacterium_H34	-2.68238	0.0787498	4.54976e-05	5.11702e-06	2.65274e-05
OTU_3468	unclassified	unclassified	unclassified	unclassified	unclassified	Unidentified	-3.47142	0.00279381	6.6086e-05	4.92021e-06	9.32044e-06
OTU_1989	Bacteroidetes	unclassified	unclassified	unclassified	unclassified	Unidentified	-2.27692	0.0895306	8.37089e-05	4.7234e-06	4.55268e-05
OTU_8385	Bacteroidetes	Bacteroidia	Bacteroidales	unclassified	unclassified	uncultured_bacterium_horsem_aai93b05	-3.49333	0.0450251	6.75263e-05	4.52659e-06	2.86783e-05
OTU_263	Firmicutes	Clostridia	Clostridiales	Ruminococcaceae	Clostridium IV	uncultured_bacterium_1101352040671	-5.03962	0.0761386	0.000565035	4.32978e-06	3.47724e-05
OTU_675	Bacteroidetes	unclassified	unclassified	unclassified	unclassified	Unidentified	-2.22683	0.00167453	2.03341e-06	3.93617e-06	7.16957e-06
OTU_5344	Bacteroidetes	unclassified	unclassified	unclassified	unclassified	Unidentified	-1.60237	0.0906755	4.40573e-06	3.14893e-06	5.73566e-06
OTU_8976	Firmicutes	Clostridia	Clostridiales	Ruminococcaceae	unclassified	Unidentified	-3.83077	0.0200118	7.92184e-05	2.75532e-06	1.68485e-05
OTU_1111	Candidatus Saccharibacteria	Saccharibacteria_genera_incertae_sedis	Saccharibacteria_genera_incertae_sedis	Saccharibacteria_genera_incertae_sedis	Saccharibacteria_genera_incertae_sedis	uncultured_bacterium_NED4G2	-3.94435	0.077913	9.30287e-05	2.75532e-06	5.73566e-05
OTU_1201	Elusimicrobia	Elusimicrobia	Elusimicrobiales	Elusimicrobiaceae	Elusimicrobium	uncultured_bacterium_GDIC2IK01B2QX8	-3.54592	0.0183387	5.71898e-05	1.96808e-06	0.000117581
OTU_509	Bacteroidetes	unclassified	unclassified	unclassified	unclassified	Unidentified	-5.22101	4.73522e-06	0.000211814	1.57447e-06	0.000110411
OTU_3205	Firmicutes	Clostridia	Clostridiales	unclassified	unclassified	Unidentified	-3.66355	0.00394143	6.37984e-05	1.57447e-06	1.89994e-05
OTU_1651	Proteobacteria	Deltaproteobacteria	Bdellovibrionales	Bdellovibrionaceae	Vampirovibrio	uncultured_bacterium_horsej_aai91b10	-3.86597	0.0341902	6.7611e-05	1.57447e-06	7.85068e-05
OTU_3557	Firmicutes	Clostridia	Clostridiales	Ruminococcaceae	unclassified	uncultured_rumen_bacterium_AF36	-1.16255	0.0945231	5.59189e-06	1.57447e-06	1.79239e-05
OTU_6430	unclassified	unclassified	unclassified	unclassified	unclassified	Unidentified	-1.8437	0.0312346	2.11814e-06	1.18085e-06	2.15087e-06
OTU_1159	Bacteroidetes	Bacteroidia	Bacteroidales	Rikenellaceae	Rikenella	uncultured_bacterium_GZ_aaa02g09	-3.97121	0.0208318	7.09153e-05	7.87233e-07	0.000104317
OTU_754	Bacteroidetes	unclassified	unclassified	unclassified	unclassified	Unidentified	-4.4377	0.0265272	0.000151998	7.87233e-07	6.81109e-05
OTU_3576	Spirochaetes	Spirochaetia	Spirochaetales	Spirochaetaceae	Treponema	Unidentified	-3.13758	0.00167453	4.13461e-05	3.93617e-07	2.86783e-05
OTU_319	Bacteroidetes	Bacteroidia	Bacteroidales	Rikenellaceae	unclassified	uncultured_bacterium_GZ_aaa04h09	-21.921	1.07508e-14	0.000398295	0	0.000138014
OTU_1366	unclassified	unclassified	unclassified	unclassified	unclassified	Unidentified	-4.73364	0.00167453	0.000100485	0	2.79613e-05
OTU_914	Bacteroidetes	unclassified	unclassified	unclassified	unclassified	Unidentified	-6.34904	0.0153773	0.000223252	0	3.40555e-05
OTU_1588	Bacteroidetes	Bacteroidia	Bacteroidales	Bacteroidales_incertae_sedis	Phocaeicola	Unidentified	-6.04027	0.0265272	0.000215118	0	0.000203257
OTU_4731	Bacteroidetes	Bacteroidia	Bacteroidales	unclassified	unclassified	Unidentified	-4.37399	0.0265272	0.00011565	0	0.000121883
OTU_5191	unclassified	unclassified	unclassified	unclassified	unclassified	Unidentified	-1.30418	0.0525949	4.06683e-06	0	3.58479e-07
